# Supplementary figures and images for: Comparative intestinal bacteria-associated pharmacokinetics of 16 components of Shengjiang Xiexin decoction between normal rats and rats with irinotecan hydrochloride (CPT-11)-induced gastrointestinal toxicity in vitro using salting-out sample preparation and LC-MS/MS
Source: Royal Society of Chemistry journal article supplement (doi:10.1039/c7ra03521g), 2017-01-01

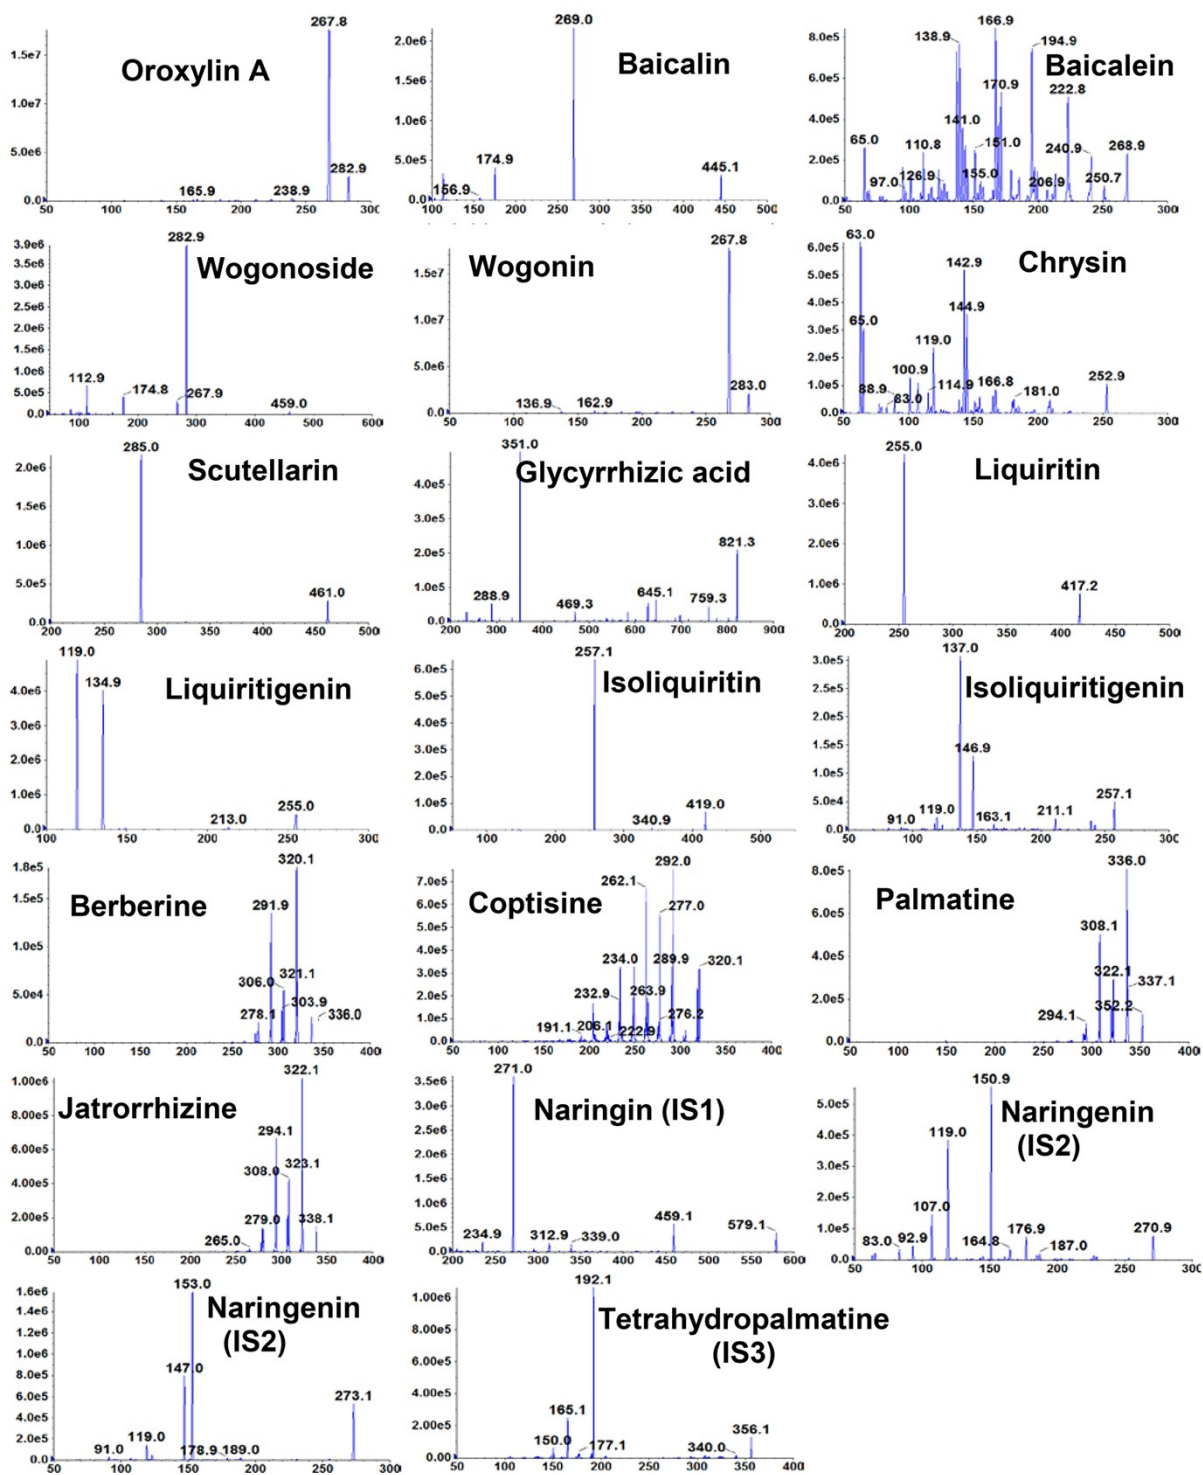

Supplement: c7ra03521g1.pdf [file c7ra03521g1.pdf]
